# Supplementary material for: Tunneling nanotubes facilitate autophagosome transfer in the leukemic niche
Source: PubMed Central journal article supplement — Leukemia. 2017 May 2;31(7):1651–4. doi: 10.1038/leu.2017.117 (PMC5508073; doi:10.1038/leu.2017.117), 2017-05-02
Supplement: leu2017117x3.pdf [file leu2017117x3.pdf]

**Supplemental Figure 1. Transduction of cells with lentiviral vectors encoding for specific cellular markers**

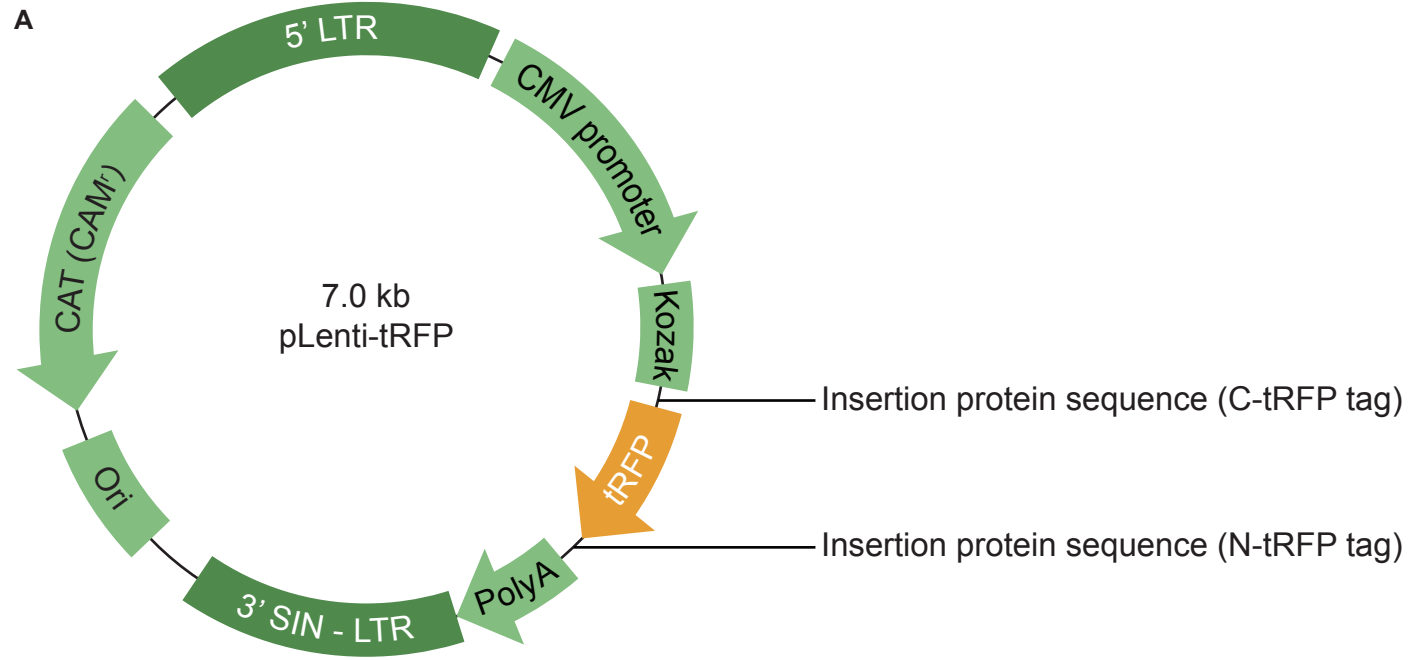

**B**

| Marker protein                                      | Cellular structure      | GENENAME | Base pairs | Tag        |
|-----------------------------------------------------|-------------------------|----------|------------|------------|
| Actin, beta                                         | Actin filaments         | ACTB     | 1852 bp    | N-tRFP tag |
| Calreticulin                                        | Endoplasmatic reticulum | CALR     | 1929 bp    | C-tRFP tag |
| Empty vector                                        | -                       | -        |            | C-tRFP tag |
| Intercellular adhesion molecule 1                   | Integrin signalling     | ICAM1    | 3249 bp    | C-tRFP tag |
| Microtubule-associated protein 1 light chain 3 beta | Autophagosomes          | MAP1LC3B | 2304 bp    | N-tRFP tag |
| Pyruvate dehydrogenase alpha 1                      | Mitochondria            | PDHA1    | 3390 bp    | C-tRFP tag |
| RAB5A, member RAS oncogene family                   | Early endosome          | RAB5A    | 2548 bp    | N-tRFP tag |
| RAB7A, member RAS oncogene family                   | Late endosome           | RAB7A    | 2240 bp    | N-tRFP tag |
| RAB11A, member RAS oncogene family                  | Recycle endosome        | RAB11A   | 4943 bp    | N-tRFP tag |
