# Supplementary figures and images for: Tunneling nanotubes facilitate autophagosome transfer in the leukemic niche
Source: PubMed Central journal article supplement — Leukemia. 2017 May 2;31(7):1651–4. doi: 10.1038/leu.2017.117 (PMC5508073; doi:10.1038/leu.2017.117), 2017-05-02

## Supplemental Figure 2. tRFP positivity of BCP-ALL clones differs between markers

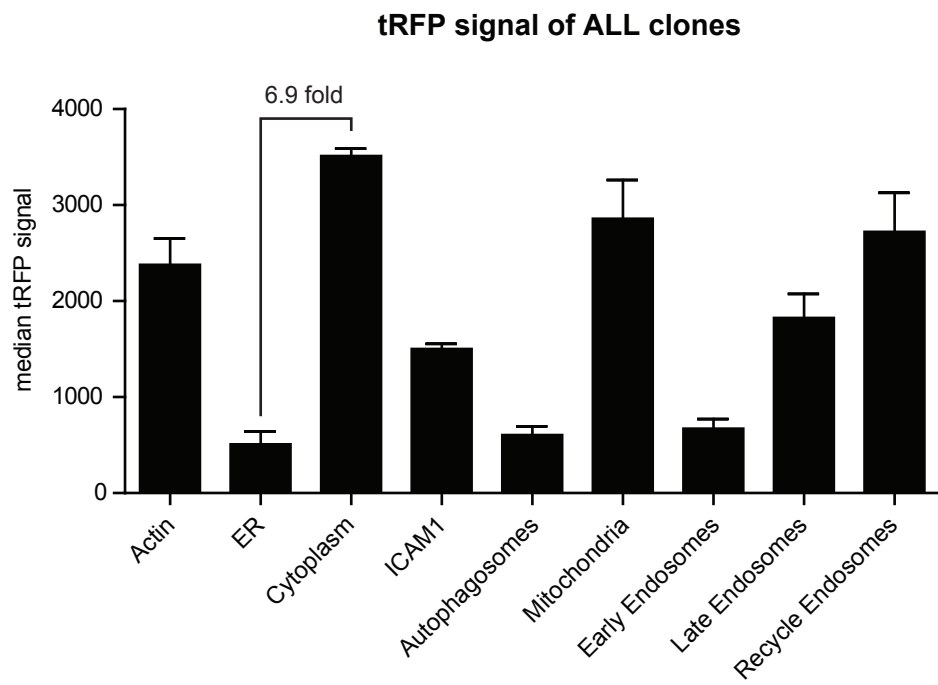

Supplement: leu2017117x4.pdf [file leu2017117x4.pdf]
